# Supplementary material for: Dependence of structures and properties of carbon nanotube fibers on heating treatment
Source: Royal Society of Chemistry journal article supplement (doi:10.1039/c1jm12346g), 2011-01-01
Supplement: c1jm12346g.pdf [file c1jm12346g.pdf]

## Supporting Information

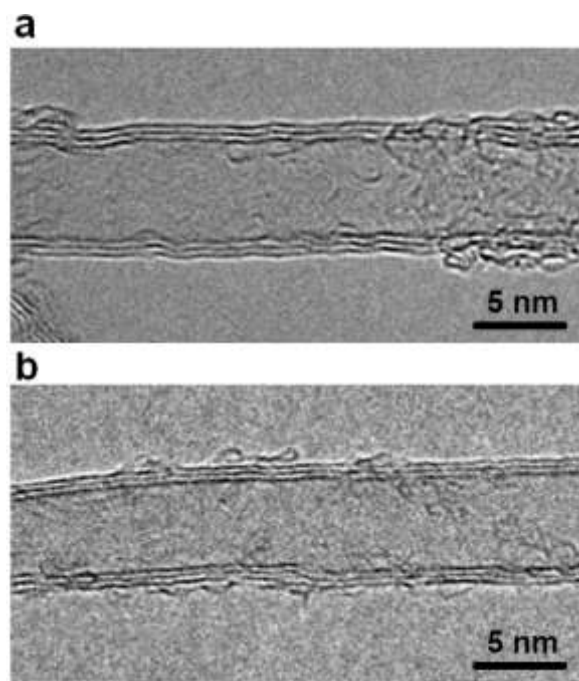

**Fig. S1.** TEM images of CNTs (a) before and after (b) heating treatments at 900 °C in argon.

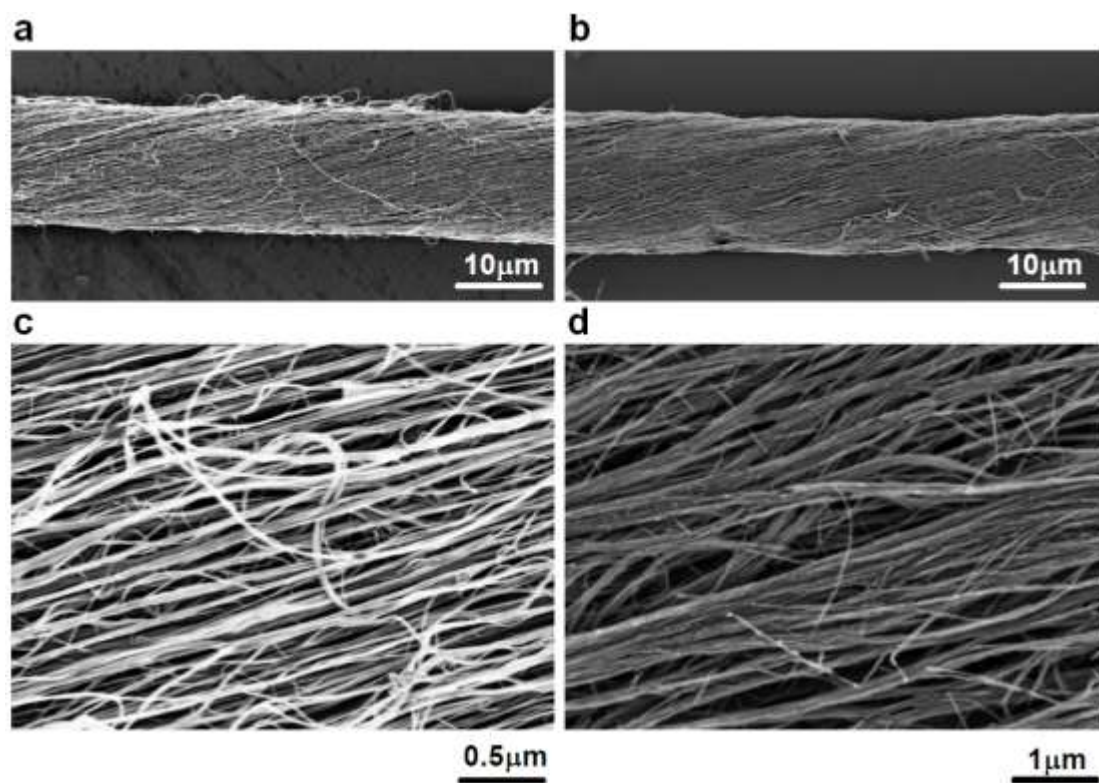

**Fig. S2.** A CNT fiber before and after heating treatment at 900 °C in argon. **a** and **c**, SEM images without heating treatment at low and high magnifications, respectively. **b** and **d**, SEM images after heating treatment at 900 °C at low and high magnifications, respectively.

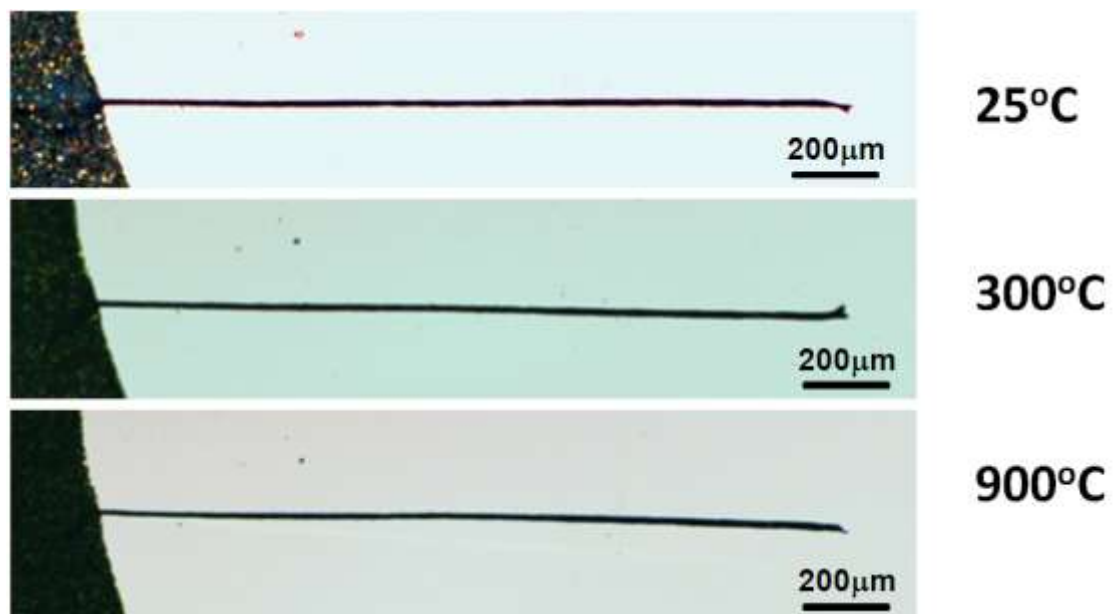

**Fig. S3.** Optical images of a CNT fiber before and after heating treatments at 300 and 900 °C in argon.

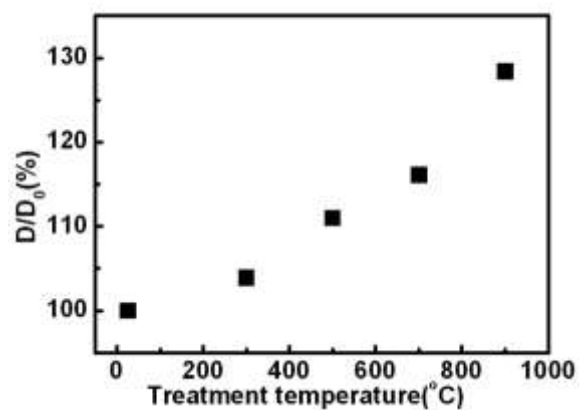

**Fig. S4.** Diameter changes of CNT fibers after heating treatments at different temperatures in argon.  $D$  and  $D_0$  correspond to the diameters before and after heating treatment.

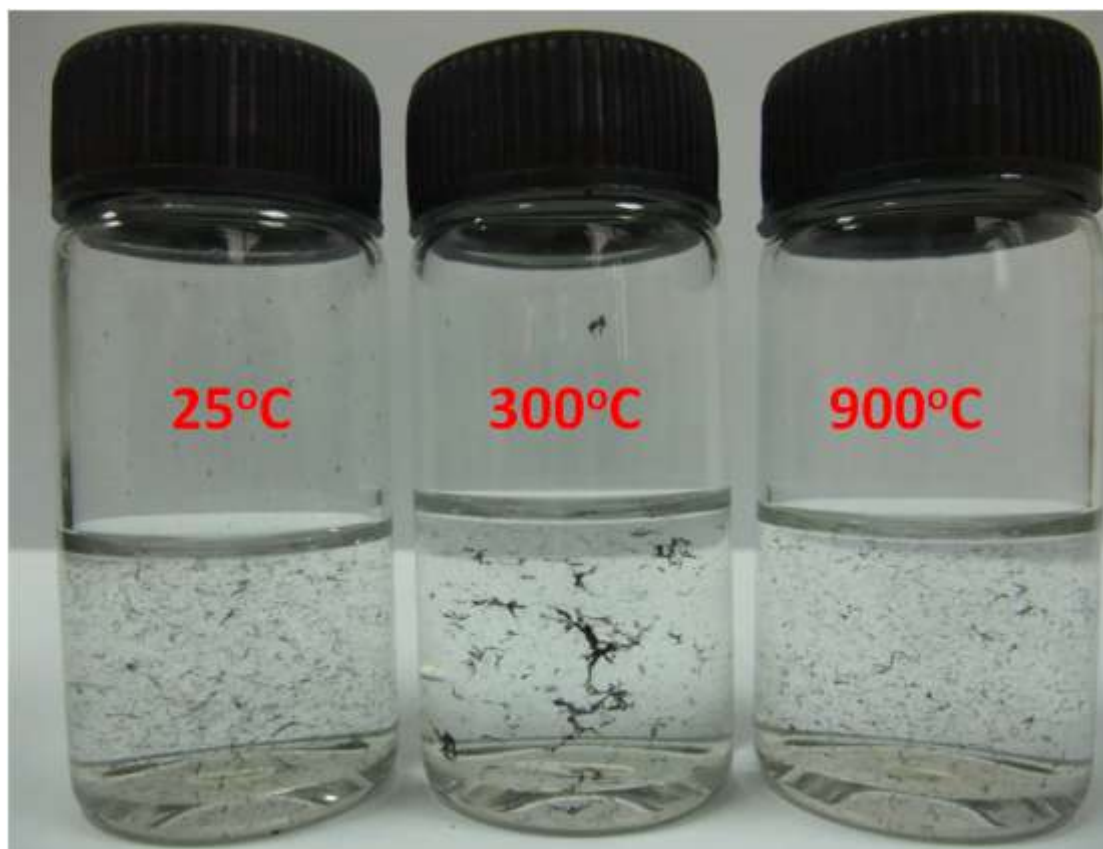

**Fig. S5.** Optical images of CNTs dispersed in ethanol after ultrasonic treatment for an hour. CNTs were obtained from the fibers before and after heating treatment at 300 and 900 °C in argon.

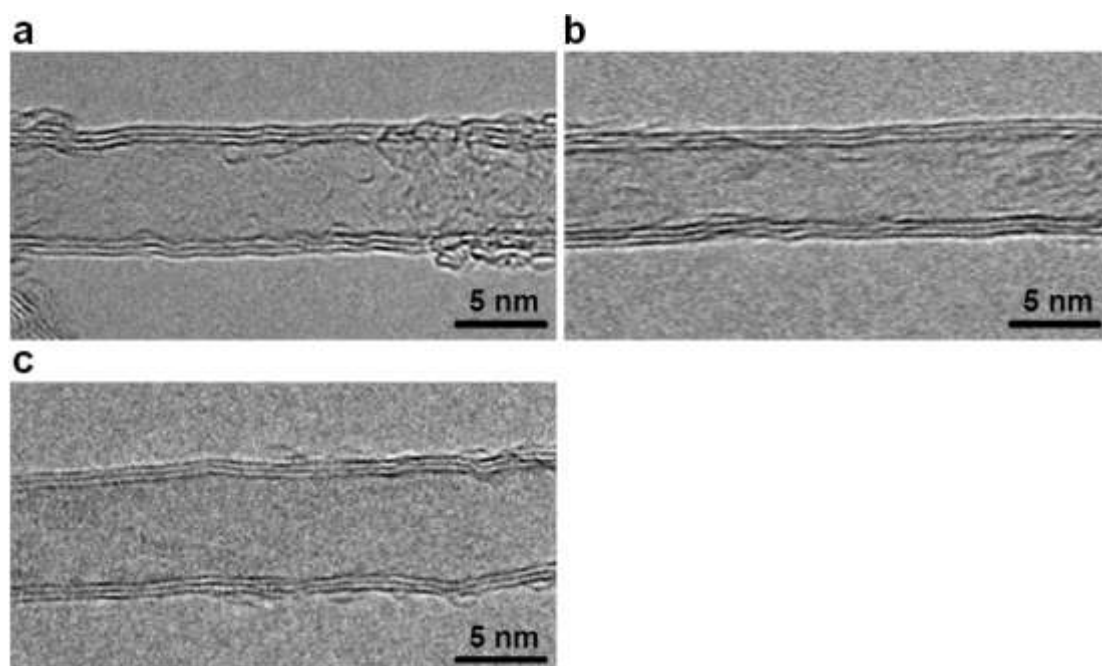

**Fig. S6.** TEM images of CNTs (a) before and after heating treatments at (b) 100 and (c) 300 °C in air.

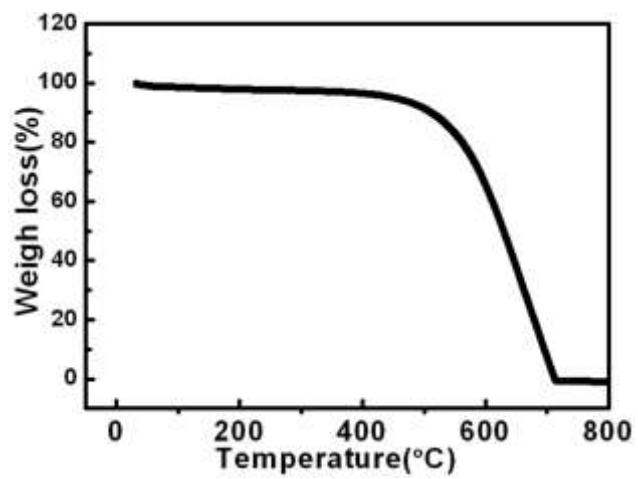

**Fig. S7.** A typical thermogravimetric analysis of CNTs.

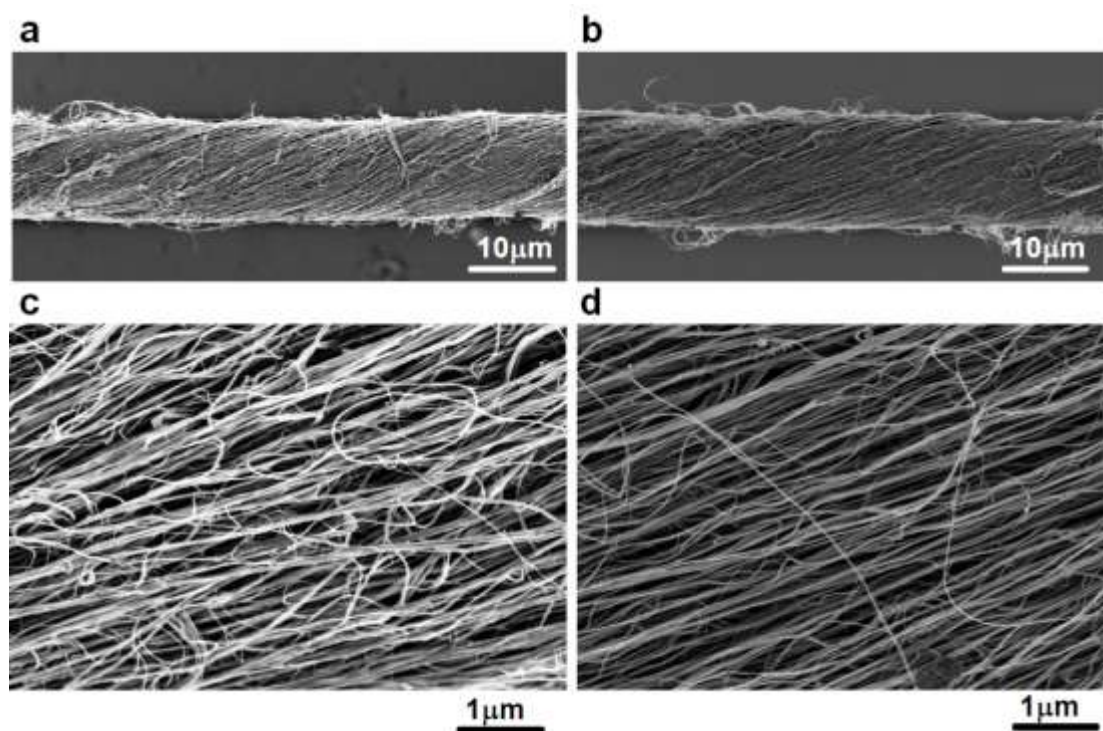

**Fig. S8.** A CNT fiber before and after heating treatment at 400 °C in air. **a** and **c**, SEM images without heating treatment at low and high magnifications, respectively. **b** and **d**, SEM images after heating treatment at 400 °C at low and high magnifications, respectively.



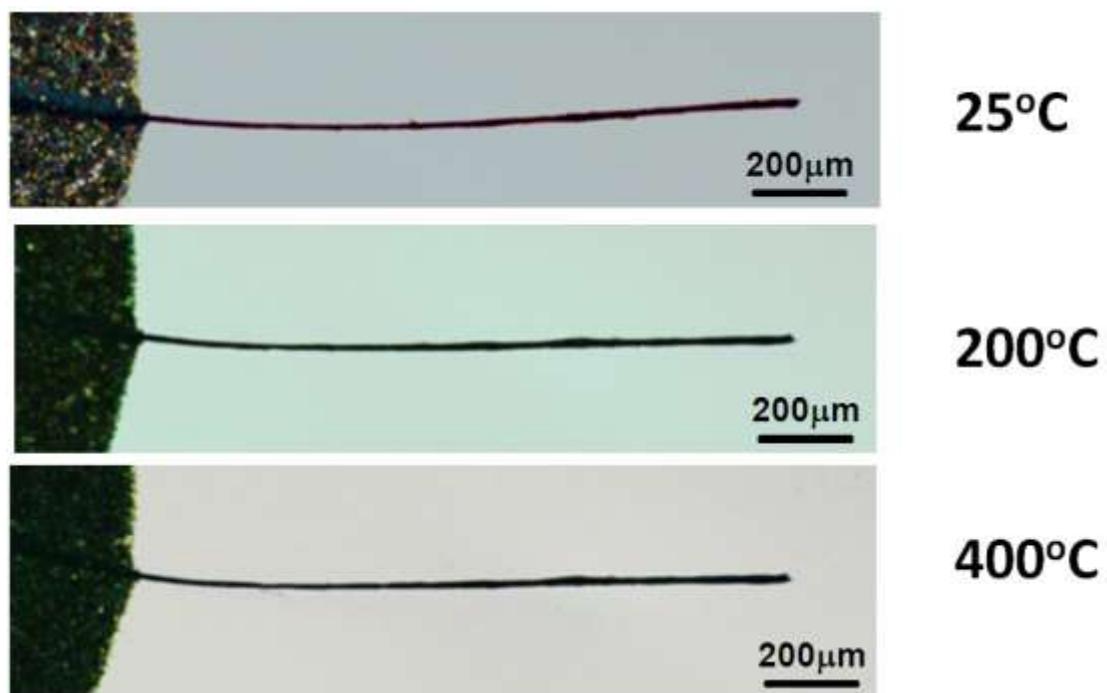

**Fig. S9.** Optical images of a CNT fiber before and after heating treatments at 200 and 400 °C in air.

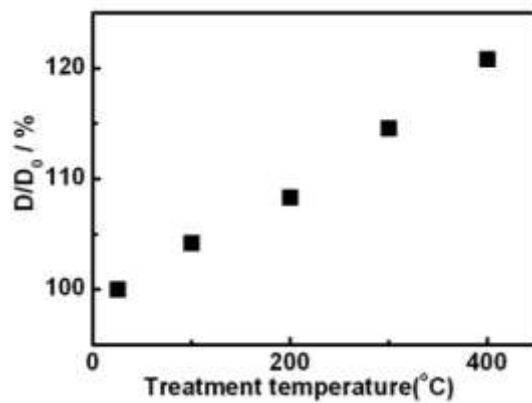

**Fig. S10.** Diameter changes of CNT fibers after heating treatments at different temperatures in air.  $D$  and  $D_0$  correspond to the diameters before and after heating treatment.

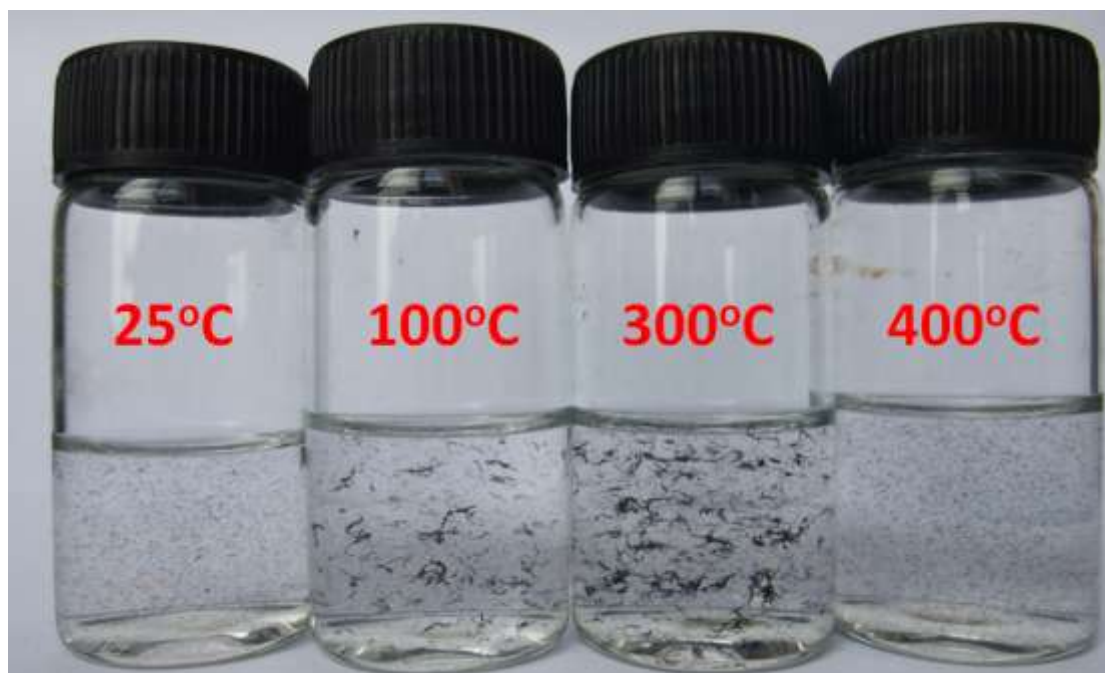

**Fig. S11.** Optical images of CNTs dispersed in ethanol after ultrasonic treatment for an hour. CNTs were obtained from the fibers before and after heating treatments at 100, 300, and 400 °C in air.
